# Supplementary material for: Multi-Centre Evaluation of the Determine HIV Combo Assay when Used for Point of Care Testing in a High Risk Clinic-Based Population
Source: PLOS journal article supplement (doi:10.1371/journal.pone.0094062), 2014-04-08
Supplement: S1 (10.1371/journal.pone.0094062.s001) [file journal.pone.0094062.s001]

Conway DP, Holt M, McNulty A, Couldwell DL, Smith DE, Davies SC, Cunningham P, Keen P, Guy R on behalf of the Sydney Rapid HIV Test Study. Multi-centre evaluation of the Determine HIV Combo assay when used for point of care testing in a high risk clinic-based population. PLOS One 2014.

## Supporting Information File S1

Table S1 Testing data & trained staff by study site

Table S2 Patient behavioural characteristics

| Table S1 Testing data & trained staff by study site                                            |                  |                  |                    |                        |
|------------------------------------------------------------------------------------------------|------------------|------------------|--------------------|------------------------|
| Study site                                                                                     | Sydney SHC       | Albion Centre    | Western Sydney SHC | North Shore SHS        |
| Patient participants (N, %)                                                                    | 1565 (63.4)      | 285 (11.6)       | 473 (19.2)         | 145 (5.9)              |
| Rapid tests performed (N, %)                                                                   | 2025 (63.4)      | 348 (10.9)       | 653 (20.4)         | 169 (5.3)              |
| True negative results* (N)                                                                     | 1986             | 332              | 647                | 168                    |
| False negative results* (N)                                                                    | 3                | 2                | 0                  | 0                      |
| True positive results* (N)                                                                     | 22               | 9                | 3                  | 0                      |
| False positive results* (N)                                                                    | 11               | 4                | 3                  | 0                      |
| Invalid rapid tests (N)                                                                        | 3                | 1                | 0                  | 1                      |
| 4 <sup>th</sup> generation laboratory screening assay                                          | Abbott Architect | Abbott Architect | Abbott Architect   | Roche Elecsys Combi PT |
| Clinician staff trained (N, %)                                                                 | 24 (35.3)        | 12 (17.7)        | 20 (29.4)          | 12 (17.7)              |
| *Refers to rapid test performance overall; SHC=sexual health centre; SHS=sexual health service |                  |                  |                    |                        |

**Table S2 Patient behavioural characteristics\***

| Characteristic                                                                              | HIV-positive (n=21)† | HIV-negative (n=1072)† | Total (n=1093)† | Chi-square; p-value |
|---------------------------------------------------------------------------------------------|----------------------|------------------------|-----------------|---------------------|
| Identifies as gay                                                                           | 19 (95.0%)           | 937 (87.7%)            | 956 (87.9%)     | ‡0.97; 0.280        |
| Ever tested for HIV                                                                         | 20 (95.2%)           | 961 (89.8%)            | 981 (89.9%)     | ‡0.67; 0.357        |
| Tests twice a year or more often                                                            | 9 (42.9%)            | 584 (54.8%)            | 593 (54.6%)     | 1.18; 0.277         |
| More than 10 sexual partners in last 6 months                                               | 8 (38.1%)            | 299 (28.2%)            | 307 (28.4%)     | 1.00; 0.318         |
| UAI with casual partners in last 6 months                                                   | 12 (57.1%)           | 367 (34.6%)            | 379 (35.0%)     | 4.62; 0.032         |
| UAI with regular partners in last 6 months                                                  | 11 (52.4%)           | 604 (57.1%)            | 615 (57.0%)     | 0.19; 0.666         |
| *Data from men participating in a survey conducted in the first 10 months of the study only |                      |                        |                 |                     |
| †Men with missing data excluded; ‡Fisher's exact test; UAI=unprotected anal intercourse     |                      |                        |                 |                     |
